# Supplementary material for: Methods for dealing with unequal cluster sizes in cluster randomized trials: A scoping review
Source: PLoS One. 2021 Jul 29;16(7):e0255389. doi: 10.1371/journal.pone.0255389 (PMC8320970; doi:10.1371/journal.pone.0255389)
Supplement: S2 File — (XLSX) [file pone.0255389.s003.xlsx]

## Sheet: S1. p-CRT continuous outcome
Supplementary material for the paper "Methods for dealing with unequal cluster sizes in cluster randomized trials: A scoping review" by Zhan et al.
	Article Information				Trial Specifications					Approach	Performance Measures Evaluated
Citation No.	Author	Journal	Title	Year	Randomization	Number of clusters	Cluster size & variability	ICC	Analytic Model	(S)imulation, (A)nalytic	Bias (Y/N)	Coverage (Y/N)	Type I error (Y/N)	Power/Sample size (Y/N)	Relative Efficiency (RE) / Design Effects (DE)
47	Kerry and Martin	Statistics in Medicine	Unequal cluster sizes for trials in English and Welsh general practice: implications for sample size calculations	2001	Simple, equal # of clusters per arm	~60	Mean cluster size changes from 93 to 203 with different CVs; different examples with different settings; check paper for details	0.005 to 0.3	Cluster level; See paper for details	A	N	N	N	Y	N
26	Manatunga et al.	Biometrical Journal	Sample size estimation in cluster randomized studies with varying cluster size	2001	Simple, equal # of clusters per arm	7 to 300	U(5,20), U(10,100), and population distribution from real data CV=0.35, 0.47 and 0.38 (respectively)	0.25, 0.5, 0.75	GEE; See paper for details	S&A	N	N	N	Y	N
50	Lake et al.	Statistics in Medicine	Sample size re‐estimation in cluster randomization trials	2002	Simple, equal # of clusters per arm	~60	Mean=4 CV= 0.5 truncated negative binomial distribution	0.1	Mixed effects model	S&A	N	N	Y	Y	N
35	Klar and Darlington	Statistics in Medicine	Methods for modelling change in cluster randomization trials	2004	Simple, equal # of clusters per arm	28	cluster sizes are randomly sampled from real data	0.03	Mixed effects model; ANOVA	S&A	N	N	Y	Y	N
37	Guittet et al.	BMC Medical Research Methodology	Planning a cluster randomized trial with unequal cluster sizes: practical issues involving continuous outcomes	2006	Simple, equal and unequal # of clusters per arm	10, 20, 40, 80	The cluster size mean and the CV is different from different setttings :1. randomly assign the N total subjects to the g clusters in each treatment arm (moderate imbalance) 2. 80% are large clusters and 20% are small clusters for each arm (analogous to Pareto effect) 3. Poisson distribution ; check paper for details	0.005, 0.02, 0.05, 0.10	Mixed effects model	S&A	Y	Y	Y	Y	N
17	Eldridge et al.	International journal of epidemiology	Sample size for cluster randomized trials: effect of coefficient of variation of cluster size and analysis method	2006	Simple, equal # of clusters per arm	~20 to 50	Mean=5 to 1000 CV=0.6 to 0.7	0.001 to 0.3	GEE; Mixed effect model	S&A	N	N	N	Y	N
29	Candel et al.	Communications in Statistics - Simulation and Computation	Optimality of Equal vs. Unequal Cluster Sizes in Multilevel Intervention Studies: A Monte Carlo Study for Small Sample Sizes	2007	Simple, equal # of clusters per arm	42	Mean=24, CV is around 0.625, cluster size follows (1) a uniform distribution; (2) a unimodal distribution; (3) a bimodal distribution; (4) a positively, and (5) negatively skewed distribution	0.01 to 0.3	Mixed effects model	S&A	N	N	N	Y	Y (RE)
39	Breukelen et al.	Statistics in Medicine	Relative efficiency of unequal versus equal cluster sizes in cluster randomized and multicentre trials	2007	Simple, equal # of clusters per arm	120	Mean=20 (three different cluster sizes) CV=0.07 to 0.80 uniform, unimodal, bimodal, positively skewed and negatively skewed	0 to 0.25	Mixed effects model	S&A	N	N	N	Y	Y (RE)
62	Taljaard et al.	Statistics in Medicine	Accounting for expected attrition in the planning of community intervention trials	2007	Simple, equal # of clusters per arm	5 to 100	16 to 600 (starting with equal cluster sizes but assuming 30 percent attrition, data missing completely at random)	0.001 to 0.1	Mixed effects model	S&A	N	N	N	Y	N
96	Breukelen et al.	Statistical Methods in Medical Research	Relative efficiency of unequal cluster sizes for variance component estimation in cluster randomized and multicentre trials	2008	Simple, equal # of clusters per arm	120	Mean=20 (three different cluster sizes) CV=0.07 to 0.80 uniform, unimodal, bimodal, positively skewed and negatively skewed	0 to 0.25	Mixed effects model	S&A	N	N	N	Y	Y (RE)
36	Hemming et al.	BMC Medical Research Methodology	Sample size calculations for cluster randomised controlled trials with a fixed number of clusters	2011	Simple, equal # of clusters per arm	Any	Any	Any	Any	A	N	N	N	Y	Y(DE)
42	You et al.	Clinical Trials	Relative efficiency and sample size for cluster randomized trials with variable cluster sizes	2011	Simple, equal # of clusters per arm	8 to 29	Mean=11 to 1000 CV=0.4, 0.6, 0.8	0.02, 0.05	Cluster level t-test; See paper for details	S&A	N	N	N	Y	Y (RE)
40	Breukelen and Candel	Statistics in Medicine	Efficiency loss because of varying cluster size in cluster randomized trials is smaller than literature suggests	2012	Simple, equal # of clusters per arm	Not stated	Mean=55, CV=0.63	0.05	Not applicable	S&A	N	N	N	Y	Y (DE)
33	Breukelen and Candel	Journal of Clinical Epidemiology	Calculating sample sizes for cluster randomized trials: We can keep it simple and efficient!	2012	Simple, equal # of clusters per arm	7 to 38	CV=0.5	close to 0	Not applicable	A	N	N	N	Y	N
48	Heo et al.	Computational Statistics and Data Analysis	Sample size requirements to detect an intervention by time interaction in longitudinal cluster randomized clinical trials with random slopes	2013	Simple, equal # of clusters per arm	20, 40	Mean=5 to 25, CV is not stated and the clsuter size follows uniform distribution	0.2 (individual interperiod correlation = 0.4, 0.6)	Mixed effects model with random slopes	S	N	N	N	Y	N
34	Lauer et al.	PLOS One	The Effect of Cluster Size Variability on Statistical Power in Cluster-Randomized Trials	2015	Simple, equal # of clusters per arm	10, 20, 40, 60	Mean =20 , 50, 75,100, 125 CV=0.5, 1.0, 1.5	0.01 to 0.2	Mixed effect model	S	N	N	N	Y	N
52	Johnson et al.	Statistics in Medicine	Recommendations for choosing an analysis method that controls Type I error for unbalanced cluster sample designs with Gaussian outcomes	2015	Simple, equal # of clusters per arm	16 to 20	8 to 128 doubly truncated normal distribution where variance scales with mean	0.001, 0.01, 0.1	Mixed effects model	S	N	N	Y	N	N
41	Candel and Breukelen	Statistics in Medicine	Repairing the efficiency loss due to varying cluster sizes in two‐level two‐armed randomized trials with heterogeneous clustering	2016	Simple, equal and unequal# of clusters per arm	6, 12 or 24 (varying ratio of clusters in Tx vs. control from 0.25, 1 to 4)	Mean= (4,4), (10,4) or (10,10), CV is not stated but the cluster size follows unimodal, uniform, bimodal, positively and negatively skewed distributions	0.01 to 0.29	Mixed effect model	S&A	N	N	N	Y	Y(RE)
28	Mukaka and Moulton	Open Access Medical Statistics	Comparison of empirical study power in sample size calculation approaches for cluster randomized trials with varying cluster sizes andndash; a continuous outcome endpoint	2016	Simple, equal # of clusters per arm	36 to 840	Mean=55 or 52 U(10,100), U(5,100), respectively CV=0.47,0.53	0.1 to 0.7	Mixed effects model; Cluster-level t-test; GEE	S	N	N	N	Y	N
27	Wang et al.	Statistical Theory and Related Fields	Power analysis for stratified cluster randomisation trials with cluster size being the stratifying factor	2017	Simple, equal # of clusters per arm for simulations ( proposed formulae allowing unbalanced clusters per arm)	See paper for details	discrete uniform and zero-truncated negative binomial distribution, CV= 0.509, 0.279, 0.351	0.01, 0.02, 0.03, 0.05, 0.1	GEE	S	N	N	N	Y	N
30	Hermans et al.	Communications in Statistics - Simulation and Computation	Fast, closed-form, and efficient estimators for hierarchical models with AR(1) covariance and unequal cluster sizes	2017	Simple and stratified , equal # of clusters per arm	See paper for details	5, 10 , 10, 5 (respective cluster sizes for the four strata)	0.01 to 0.99	Mixed effects model	S&A	N	N	N	N	Y(DE)
12	Leyrat et al.	International journal of epidemiology	Cluster randomized trials with a small number of clusters: which analyses should be used?	2018	Simple, equal # of clusters per arm	4 to 200	Mean = 7 to 300, CV=0.4, 0.8 Negative binomial	0.001, 0.01, 0.05	GEE; Mixed effects model; Cluster-level regression	S	Y	N	Y	Y	N
23	Shi et al.	Statistical Methods in Medical Research	Sample size calculations for group randomized trials with unequal group sizes through Monte Carlo simulations	2018	Simple, equal # of clusters per arm	20 or 78	Mean=50 (range 5-500) Truncated normal/Poisson/Pareto distributions CV=0-1.6	0,01, 0.02, 0.05, 0.1	Mixed effects model	S	N	N	N	Y	N
22	Liu and Colditz	Biometrical Journal	Relative efficiency of unequal versus equal cluster sizes in cluster randomized trials using generalized estimating equation models.	2018	Simple, equal # of clusters per arm	5 to 100	Mean=5 to 100, See paper for CV details, Multinomial distribution	0 to 1	GEE	S&A	N	N	N	Y	Y (RE)
49	Amatya and Bhaumik	Biometrics	Sample Size Determination for Multilevel Hierarchical Designs Using Generalized Linear Mixed Models	2018	Simple, equal and unequal # of clusters per arm	19-47	Unif(10,30) Gamma(4,5)	0.1 to 0.24	Mixed effects model (three-level, longitudinal data)	S&A	N	N	Y	Y	N
55	Hermans et al.	Statistica sinica	Clusters with unequal size: Maximum likelihood versus weighted estimation in large samples	2018	Simple, equal # of clusters per arm	See paper for details	See paper for details	See paper for details	Mixed effects model	S	Y	N	N	N	N
18	Martin et al.	BMC Medical Research Methodology	The impact of varying cluster size in cross-sectional stepped-wedge cluster randomised trials	2019	Simple and stratified, equal # of clusters per arm	12, 24 48, 96	Mean=15 to 100, Gamma distribution CV=0.25 to 1.5	Cluster mean correlation = 0 to 1	Mixed effects model	S	N	N	N	Y	Y (RE)
19	Wong et al.	Trials	The randomization-induced risk of atrial failing to attain its target power:assessment and mitigation	2019	Simple and stratified, equal # of clusters per arm	20	(S,M,L)=(10,40,160), CV=0.95	0.005	Mixed effects model	S	N	N	N	Y	N
43	Liu et al.	Journal of Biopharmaceutical Statistics	Relative efficiency of equal versus unequal cluster sizes in cluster randomized trials with a small number of clusters	2020	Simple, equal # of clusters per arm	12 or 24	Mean=5, 30, 60, 120 CV=0.29 to 0.86	0.38 in example	GEE	S&A	N	N	N	Y	Y(RE)
44	Liu and Colditz	Statistics in Medicine	Sample size calculation in three‐level cluster randomized trials using generalized estimating equation models	2020	Simple, equal # of clusters per arm	50	Mean=10, 20, CV=0.15 to 1.36	0 to 1	GEE	S&A	N	N	N	Y	Y(DE)
32	Watson et al.	Statistics in Medicine	Design and analysis of three‐arm parallel cluster randomized trials with small numbers of clusters.	2020	Simple and stratified , allow unequal # of clusters per arm	6 to 22	Mean=25, CV=0.49	0.001 to 0.05	Mixed effects model	S	Y	N	Y	Y	N
51	Harden and Friede	Biometerical Journal	Sample size recalculation in multicenter randomized controlled clinical trials based on noncomparative data.	2020	Stratified, equal # of clusters per arm	46 in the example	Not stated	~0.5	Mixed effects model	S&A	N	N	N	Y	N
45	Innocenti et al.	Statistical Methods in Medical Research	Optimal two-stage sampling for mean estimation in multilevel populations when cluster size is informative	2020	Simple, equal # of clusters per arm	~48; See paper for details	Cluster sizes vary from 5 to 45, see paper for details, CV=0 to 1	0 to 0.1	Mixed effects model	S&A	N	N	N	Y	Y(RE)

## Sheet: S2. p-CRT binary outcome
Supplementary material for the paper "Methods for dealing with unequal cluster sizes in cluster randomized trials: A scoping review" by Zhan et al.
	Article Information				Trial Specifications					Approach	Performance Measures Evaluated
Citation No.	Author	Journal	Title	Year	Randomization	Number of clusters	Cluster size & variability	ICC	Analytic Model	(S)imulation, (A)nalytic	Bias (Y/N)	Coverage (Y/N)	Type I error (Y/N)	Power/Sample size (Y/N)	Relative Efficiency (RE) / Design Effects (DE)
46	Donner et al.	American Journal of Epidemiology	Randomization by cluster: sample size requirements and analysis	1981	Simple, equal # of clusters per arm	Not applicable	Not applicable	Not applicable	Cluster level; See paper for details	A	N	N	N	Y	N
59	Jung et al.	Statistics in Medicine	Sample size calculations for clustered binary data	2001	Simple, equal # of clusters per arm	7 to 100	Mean=4.9, CV is around 0.24	0.1, 0.3, 0.5	Correlation model	A	N	N	N	Y	N
31	Hoffman et al.	Biometrika	Within-cluster resampling	2001	Simple, equal # of clusters per arm	50 to 250	Mean=6 Distribution: Binomial(9,0.75), truncated (no cluster sizes of 0 and 9)	0, 0.2	GEE	S	N	Y	Y	Y	N
70	Mancl and DeRouen	Biometrics	A covariance estimator for GEE with improved small‐sample properties	2001	Simple, equal # of clusters per arm	10 to 40	Mean=32, CV not specified	0.1, 0.3	GEE	S&A	N	N	Y	Y	N
60	Braun	Statistical Modelling	A mixed model formulation for designing cluste randomized trials with binary outcomes	2003	Simple, equal # of clusters per arm	12, 16 and 24	cluster sizes that vary uniformly within each arm such that the cluster sizes increase and decrease in increments of five from a median cluster size of 50	0.01-0.05	GEE; Mixed effects model	S&A	N	N	N	Y	N
61	Kang et al.	Drug information journal	Sample size calculation for dichotomous outcomes in cluster randomization trials with varying cluster size	2003	Simple, equal # of clusters per arm	30 to 500	U(5,20), U(10,100)	0.25, 0.5, 0.75	Not applicable	S&A	N	N	N	Y	N
71	Williamson et al.	Biometrics	Marginal Analyses of Clustered Data When Cluster Size Is Informative	2003	Simple, equal # of clusters per arm	50, 500	Binomial(0.75, 9) or Binomial(0.25,9), truncated (cluster size 0, 8 or 9 not allowed)	0.15 in control; 0.25 in treatment	GEE	S	Y	N	N	N	N
67	Stefanescu and Turnbull	Biometrics	Likelihood inference for exchangeable binary data with varying cluster sizes	2003	Simple, equal # of clusters per arm	Not stated	cluster size <150, CV is not stated	Not stated	Binomial, Beta-binomial, Saturated model	S&A	N	N	N	N	N
66	Heo et al.	Journal of Biopharmaceutical Statistics	Performance of a mixed effects logistic regression model for binary outcomes with unequal cluster size	2005	Simple, equal # of clusters per arm	20,100, 400	Mean=5, 20, 25, 100 sampled from U(2,8), U(15,25), U(10,40), U(95,105) and U(50,150)	0, 0.05, 0.1, 0.3, 0.5	Mixed effects model	S&A	Y	N	Y	Y	Y(RE)
17	Eldridge et al.	International journal of epidemiology	Sample size for cluster randomized trials: effect of coefficient of variation of cluster size and analysis method	2006	Simple, equal # of clusters per arm	~20 to 50	Mean=5 to 1000 CV=0.6 to 0.7	0.001 to 0.3	GEE; Mixed effects model	S&A	N	N	N	Y	N
62	Taljaard et al.	Statistics in Medicine	Accounting for expected attrition in the planningof community intervention trials	2007	Simple, equal # of clusters per arm	5 to 100	16 to 600 (starting with equal cluster sizes but assuming 30 percent attrition, data missing completely at random)	0.001 to 0.1	Mixed effects model	S&A	N	N	N	Y	N
68	Stedman et al.	Contemporary Clinical Trials	An evaluation of statistical approaches for analyzing physician-randomized quality improvement interventions	2008	Simple, equal # of clusters per arm	458	1st & 4th simulation:fixed at 8 2nd & 3rd simulation: 1 to 150	0.11 to 0.20 (estimated by ANOVA)	GEE; NLMM PQL; Permutation test	S	Y	Y	Y	Y	Y (DE)
56	Chakraborty et al.	Contemporary Clinical Trials	A simulation based technique to estimate intracluster correlation for a binary variable	2009	Simple, equal # of clusters per arm	36 to 180	Mean=300 to 1000 Range: 200 to 1800 (e.g. 200 to 400 for mean of 300, and 200 to 1800 for mean of 1000) uniform distriubiton	0.0001 to 0.0015	ANOVA	S	N	N	N	N	N
99	Ahn et al.	Contemporary Clinical Trials	Effect of Imbalance and Intracluster Correlation Coefficient in Cluster Randomization Trials with Binary Outcomes When the Available Number of Clusters is Fixed in Advance	2009	Simple, equal # of clusters per arm	20 , 40, 60	truncated negative binomial distribution Instead of CV, this paper uses kappa=1/(1+CV^2) as a measure of cluster size variabiltity; kappa=0.6, 0.8, or 1.0	0.01, 0.02, 0.05, 0.1	Not applicable	S&A	N	N	N	Y	N
100	Ahn et al.	Computational Statistics and Data Analysis	Effect of imbalance and intracluster correlation coefficient in cluster randomized trials with binary outcomes	2009	Simple, equal # of clusters per arm	Not stated	Setting 1: Mean=10, 25, 50, 100, 300 setting 2: mean=5, 10, 20 Instead of CV, this paper uses kappa=1/(1+CV^2) as a measure of cluster size variabiltity; kappa=0.6, 0.8, or 1.0 truncated negative binomial distribution	Setting 1: 0.01, 0.05 Setting 2: 0.25 ,0.5, 0.75	GEE	S&A	N	N	N	Y	N
57	Chakraborty et al.	Contemporary Clinical Trials	Intracluster correlation adjustments to maintain power in cluster trials for binary outcomes	2009	Simple, equal # of clusters per arm	20, 50, 100, 200, 300, 400, 500	Mean=5, 50, 300 CV=0.10, 0.25, 0.5	0 to 0.25	ANOVA	S	N	N	N	N	N
58	Candel and Breukelen	Statistics in Medicine	Sample size adjustments for varying cluster sizes in cluster randomized trials with binary outcomes analyzed with second‐order PQL mixed logistic regression	2010	Simple, equal # of clusters per arm	54 or 24	Mean=24 (for 54 clusters) or 80 (for 24 clusters) CV=0.31 to 0.71 uniform distribution, unimodal distribution, bimodal distribution, positively skewed distribution, negatively skewed distribution	0.02 to 0.3 (0.02 steps)	Second-order PQL mixed effects model	S&A	N	N	N	Y	Y (RE)
36	Hemming et al.	BMC Medical Research Methodology	Sample size calculations for cluster randomised controlled trials with a fixed number of clusters	2011	Simple, equal # of clusters per arm	Any	Any	Any	Any	A	N	N	N	Y	N
63	Caille et al.	Statistics in Medicine	Dichotomizing a continuous outcome in cluster randomized trials: impact on power	2012	Simple, equal # of clusters per arm	60, 100	Mean=2, 7, 50, 100 (fixed or variable) If variable, cluster sizes are drawn from zero-truncated Poisson distribution (parameter=mean).	0 to 0.3	GEE	S	N	N	Y	Y	N
75	Westgate and Braun	Statistics in Medicine	The effect of cluster size imbalance and covariates on the estimation performance of quadratic inference functions	2012	Simple, equal # of clusters per arm	20, 21, 100	Mean=100 truncated normal distribution, or uniform	0.05, 0.10, 0.15 (same or different for treatment and control clusters)	QIF; GEE	S	N	N	N	N	Y(DE)
97	Li and Redden	Statistics in medicine	Small Sample Performance of Bias-corrected Sandwich Estimators for Cluster-Randomized Trials with Binary Outcomes	2015	Simple, equal # of clusters per arm	10. 20, 30	Mean = 10, 20, 50, 100, 150 CV=0 to 1 cluster size drawn from truncated normal distribution	0.001, 0.01, 0.05	GEE	S&A	N	N	Y	Y	N
98	Li and Redden	BMC medical research methodology	Comparing denominator degrees of freedom approximations for the generalized linear mixed model in analyzing binary outcome in small sample cluster-randomized trials	2015	Simple, equal # of clusters per arm	10, 20, 30	Mean= 20, 50, 100 CV=0 to 1 cluster size drawn from truncated normal distribution	0.001 to 0.1	Mixed effects model	S&A	N	N	Y	Y	N
23	Shi and Lee	Statistical Methods in Medical Research	Sample size calculations for group randomized trials with unequal group sizes through Monte Carlo simulations	2018	Simple, equal # of clusters per arm	20, 78	Mean=50 (range 5 to 500) Truncated normal/Poisson/Pareto distributions CV=0 to 1.6	0.01, 0.02, 0.05, 0.1	Mixed effects model	S	N	N	N	Y	N
22	Liu and Golditz	Biometrical Journal	Relative efficiency of unequal versus equal cluster sizes in cluster randomized trials using generalized estimating equation models.	2018	Simple, equal # of clusters per arm	5 to 100	Mean=5 to 100, See paper for CV details, multinomial distribution	0 to 1	GEE	S&A	N	N	N	Y	Y (RE)
49	Amatya and Bhaumik	Biometrics	Sample Size Determination for Multilevel Hierarchical Designs Using Generalized Linear Mixed Models	2018	Simple, equal and unequal # of clusters per arm	19 to 47	Unif(10,30) Gamma(4,5)	0.1 to 0.24	Mixed effects model (three-level, longitudinal data)	S&A	N	N	Y	Y	N
64	Xu et al.	Statistics in Medicine	Sample size considerations for stratified cluster randomization design with binary outcomes and varying cluster size.	2019	Simple and stratified, equal # of clusters per arm	12 to 147 per treatment group per stratum	U(1, 10), U(11, 30), U(31, 100)	0.02, 0.05, 0.1	Mixed effects model	S&A	N	N	N	Y	N
54	Agbla et al.	Statistical Methods in Medical Research	Estimating cluster-level local average treatment effects in cluster randomised trials with non-adherence	2019	Simple and stratified, equal # of clusters per arm at the beginning, unbalanced due to non-adherence	10, 50 (total sample size fixed at 1000)	Pareto distributed with Mean=20, Shape=1.8, Scale=9.1	0.05, 0.8	Cluster level	S	Y	Y	Y	N	Y(DE)
43	Liu et al.	Journal of Biopharmaceutical Statistics	Relative efficiency of equal versus unequal cluster sizes in cluster randomized trials with a small number of clusters	2020	Simple, equal # of clusters per arm	12, 24	Mean = 5, 30, 60, 120 CV= 0.29 to 0.86	0.38 in example	GEE	S&A	N	N	N	Y	Y(RE)
44	Liu and Colditz	Statistics in Medicine	Sample size calculation in three‐level cluster randomized trials using generalized estimating equation models	2020	Simple, equal # of clusters per arm	50	Mean =20, CV= 0.15 to 1.36	0 to 1	GEE	S&A	N	N	N	Y	Y(DE)
65	Kennedy and Hughes	Statistics in Medicine	Sample size estimation for stratified individual and cluster randomized trials with binary outcomes	2020	Simple and stratified, equal and unequal # of clusters per arm	Not stated	Mean=2, 4, 8, 32 CV=~0.75	0 to 0.15	GEE	A	N	N	N	Y	N

## Sheet: S3. p-CRT count outcome
Supplementary material for the paper "Methods for dealing with unequal cluster sizes in cluster randomized trials: A scoping review" by Zhan et al.
	Article Information				Trial Specifications					Approach	Performance Measures Evaluated
Citation No.	Author	Journal	Title	Year	Randomization	Number of clusters	Cluster size & variability	ICC	Analytic Model	(S)imulation, (A)nalytic	Bias (Y/N)	Coverage (Y/N)	Type I error (Y/N)	Power/Sample size (Y/N)	Relative Efficiency (RE) / Design Effects (DE)
72	Pacheco et al.	Statistics in Medicine	Performance of analytical methods for overdispersed counts in cluster randomized trials: Sample size, degree of clustering and imbalance	2009	Simple, equal # of clusters per arm	10, 20, 40	Mean=30 CV=0.2 or 0.6 truncated normal distribution (minimum of 8)	Between cluster SD=0.05, 0.15, 0.4 (on log-rate scale)	Two-sample t-test; GEE; Mixed effects model; Bayesian hierarchical model	S&A	Y	Y	Y	Y	Y (DE)
22	Liu and Colditz	Biometrical Journal	Relative efficiency of unequal versus equal cluster sizes in cluster randomized trials using generalized estimating equation models.	2018	Simple, equal # of clusters per arm	5 to 100	Mean=5 to 100, see paper for CV details, multinomial distribution	0 to 1	GEE	S&A	N	N	N	Y	Y (RE)
49	Amatya and Bhaumik	Biometrics	Sample Size Determination for Multilevel Hierarchical Designs Using Generalized Linear Mixed Models	2018	Simple, equal and unequal # of clusters per arm	19 to 47	Unif(10, 30) Gamma(4, 5)	0.1 to 0.24	Mixed effects model (three-level, longitudinal data)	S&A	N	N	Y	Y	N
73	Wang et al.	Communications in Statistics - Theory and Methods	Sample size calculation for count outcomes in cluster randomization trials with varying cluster sizes	2018	Simple, equal and unequal # of clusters per arm	55, 59	Discrete uniform distributions DU[5, 15] and DU[25, 85] with Mean=10, 55; Variance=10, 510; CV=0.32, 0.41	0.05, 0.15, 0.25, 0.35, 0.45, 0.55	Correlation model	S&A	N	N	Y	Y	N
43	Liu et al.	Journal of Biopharmaceutical Statistics	Relative efficiency of equal versus unequal cluster sizes in cluster randomized trials with a small number of clusters	2020	Simple, equal # of clusters per arm	12, 24	Mean=5, 30, 60, 120 CV= 0.29 to 0.86	0.38 in example	GEE	S&A	N	N	N	Y	Y (RE)
44	Liu and Colditz	Statistics in Medicine	Sample size calculation in three‐level cluster randomized trials using generalized estimating equation models	2020	Simple, equal # of clusters per arm	50	Mean=20, CV=0.15 to 1.36	0 to 1	GEE	S&A	N	N	N	Y	Y(DE)
74	Li et al.	Statistics in Medicine	Incorporating pragmatic features into power analysis for cluster randomized trials with a count outcome	2020	Simple, equal # of clusters per arm	14 to 49	DU(34, 56) and DU(10, 80)	0.02, 0.04, 0.06	GEE	S&A	N	N	Y	Y	N

## Sheet: S4. p-CRT survival outcome
Supplementary material for the paper "Methods for dealing with unequal cluster sizes in cluster randomized trials: A scoping review" by Zhan et al.
	Article Information				Trial Specifications					Approach	Performance Measures Evaluated
Citation No.	Author	Journal	Title	Year	Randomization	Number of clusters	Cluster size & variability	ICC	Analytic Model	(S)imulation, (A)nalytic	Bias (Y/N)	Coverage (Y/N)	Type I error (Y/N)	Power/Sample size (Y/N)	Relative Efficiency (RE) / Design Effects (DE)
75	Jung	Journal of Biopharmaceutical Statistics	Sample size calculation for weighted rank tests comparing survival distributions under cluster randomization: a simulation method	2007	Simple, equal # of clusters per arm	Data from two real trial examples	Data from two real trial examples	Data from two real trial examples	Marginally exponential model	S&A	N	N	N	Y	N
77	Stedman et al.	Comtemporary Clinical Trials	A comparison of statistical approaches for physician-randomized trials with survival outcomes	2012	Simple, equal # of clusters per arm	458	Histogram of the distribution of cluster sizes is provided (from real data), but mean and CV were not reported	0.03 to 0.04	Nonlinear mixed effects model; Marginal proportional hazards model; Clustered logrank test; Clustered permutation test	S&A	Y	Y	Y	Y	Y (DE)
76	Li and Jung	Statistics in Medicine	Sample size calculation for cluster randomization trials with a time‐to‐event endpoint	2020	Simple, equal and unequal # of clusters per arm	Data from three real trial examples	Uniform distributed U(9, 13), U(2, 20)	0.1 to 0.7	Weighted rank tests	S&A	N	N	Y	Y	N

## Sheet: S5. sw-CRT continuous outcome
Supplementary material for the paper "Methods for dealing with unequal cluster sizes in cluster randomized trials: A scoping review" by Zhan et al.
	Article Information				Trial Specifications					Approach	Performance Measures Evaluated
Citation No.	Author	Journal	Title	Year	Randomization	Number of clusters	Cluster size & variability	ICC	Analytic Model	(S)imulation, (A)nalytic	Bias (Y/N)	Coverage (Y/N)	Type I error (Y/N)	Power/Sample size (Y/N)	Relative Efficiency (RE) / Design Effects (DE)
25	Kristunas et al.	Trials	An imbalance in cluster sizes does not lead to notable loss of power in cross-sectional, stepped-wedge cluster randomised trials with a continuous outcome	2017	Simple, equal # of clusters per arm	11 to 28 with 3-8 steps	Mean=10, 20, 30, 40 CV=0 to 1.6 Poisson or Pareto distribution	0.05	GEE	S&A	N	N	N	Y	N
82	Girling	Statistics in Medicine	Relative efficiency of unequal cluster sizes in stepped wedge and other trial designs under longitudinal or cross‐sectional sampling	2018	Simple and stratified, equal # of clusters per arm	See paper for details	Cluster size mean is not stated and the cluster size follows different distributions, check the paper for details, CV^2=0.1, 0.3, 0.5, 1	0 to 1	Mixed effects model	S&A	N	N	N	Y	Y(RE)
20	Matthews	Biometrics	Highly Efficient Stepped Wedge Designs for Clusters of Unequal Size	2019	Simple and stratified, equal and unequal # of clusters per arm	data from different trial examples	See paper for detail	0.0036, 0.05, 0.1	Mixed effects model	S&A	N	N	N	Y	Y(DE)
84	Harrison et al.	Biometrics	Power calculation for cross-sectional stepped wedge cluster randomized trials with variable cluster sizes	2019	Simple and stratified, equal # of clusters per arm	24	Mean=30, CV=0 to 2.1	0.01 to 0.25	Mixed effects model	S&A	N	N	N	Y	Y(DE,RE)
24	Hussey and Hughes	Contemporary Clinical Trials	Design and analysis of stepped wedge cluster randomized trials	2007	Simple, equal # of clusters per arm	24	Mean=100, CV=0.3, multinomial distribution with parameters from a Dirichlet distribution (1,1,1))	0.0047	Mixed effects model; GEE	S&A	N	N	N	Y	N
80	Hughes et al.	Biometrics	Robust inference for the stepped wedge design	2019	Simple, equal # of clusters per arm	12, 24, 36	Mean=10; lognormal distribution (rounded to the nearest integer) with SD=0.2, 1.0	~0.17	Mixed effects model	S&A	Y	Y	Y	Y	N
18	Martin et al.	BMC Medical Research Methodology	The impact of varying cluster size in cross-sectional stepped-wedge cluster randomised trials	2019	Simple and stratified, equal # of clusters per arm	12, 24, 48, 96	Gamma distribution CV=0.25 to 1.5	Cluster mean correlation=0 to 1	Mixed effects model	S	N	N	N	Y	Y (RE)
19	Wong et al.	Trials	The randomization-induced risk of a trial failing to attain its target power:assessment and mitigation	2019	Simple and stratified, equal # of clusters per arm	20	(S, L)=(6 to 86, 109 to 234), CV=1.17	0.05	Mixed effects model	S	N	N	N	Y	N
85	Kasza et al.	Statistics in Medicine	Information content of stepped wedge designs with unequal cluster‐period sizes in linear mixed models: Informing incomplete designs	2021	Simple, equal # of clusters per arm	See paper for details	Gamma distribution with Scale=4.94, Shape=18.25	~0.015	Mixed effects model	S&A	N	N	N	Y	Y(DE)
83	Ouyang et al.	BMC Medical Research Methodology	Explaining the variation in the attained power of a stepped-wedge trial with unequal cluster sizes	2020	Simple and stratified, equal # of clusters per arm	12, 24, 48	See paper for cluster size details; CV=0.4, 0.7, 1.0, 1.3	0.01, 0.05, 0.10	Mixed effects model	S	N	N	N	Y	N

## Sheet: S6. sw-CRT binary outcome
Supplementary material for the paper "Methods for dealing with unequal cluster sizes in cluster randomized trials: A scoping review" by Zhan et al.
	Article Information				Trial Specifications					Approach	Performance Measures Evaluated
Citation No.	Author	Journal	Title	Year	Randomization	Number of clusters	Cluster size & variability	ICC	Analytic Model	(S)imulation, (A)nalytic	Bias (Y/N)	Coverage (Y/N)	Type I error (Y/N)	Power/Sample size (Y/N)	Relative Efficiency (RE) / Design Effects (DE)
24	Hussey and Hughes	Contemporary Clinical Trials	Design and analysis of stepped wedge cluster randomized trials	2007	Simple, equal # of clusters per arm	24	Mean=100, CV=0.3, multinomial distribution	0.0047	Mixed effects model; GEE	S&A	N	N	N	Y	N
86	Zhou et al.	Biostatistics	A maximum likelihood approach to power calculations for stepped wedge designs of binary outcomes	2018	Simple, equal # of clusters per arm	16	Mean=30, multinomial distribution with total sample size fixed for 480 of the 16 clusters CV=0.6 or 2	0.01	Mixed effects model	S&A	N	N	N	Y	N
80	Hughes et al.	Biometrics	Robust inference for the stepped wedge design	2019	Simple, equal # of clusters per arm	12, 24, 36	Mean=10; lognormal distribution (rounded to the nearest integer) with SD=0.2, 1.0	~0.17	Mixed effects model	S&A	Y	Y	Y	Y	N
87	Li et al.	Biostatistics	Marginal modeling of cluster-period means and intraclass correlations in stepped wedge designs with binary outcomes	2020	Simple, equal # of clusters per arm	12 to 120	Mean and CV are not stated but the cluster-period sizes drawn from DiscreteUniform(25, 50).	0.015 to 0.7157	GEE	S&A	Y	Y	N	N	N
88	Thompson et al.	Statistics Methods in Medcial Research	Comparison of small-sample standard-error corrections for generalised estimating equations in stepped wedge cluster randomised trials with a binary outcome: A simulation study.	2020	Simple, equal # of clusters per arm	6 to 54	Mean=24 to 300, CV=0 to 0.4	0.01, 0.05, 0.1	GEE	S&A	Y	N	Y	Y	N
89	Ford and Westgate	Statistics in Medicine	Maintaining the validity of inference in small‐sample stepped wedge cluster randomized trials with binary outcomes when using generalized estimating equations.	2021	Simple, equal # of clusters per arm	3 to 24	Mean=10, 25; CV=0.45 and 0.4, negative binomial distribution	0.01 to 0.1	GEE	S&A	Y	N	Y	N	N

## Sheet: S7. pn-CRT
Supplementary material for the paper "Methods for dealing with unequal cluster sizes in cluster randomized trials: A scoping review" by Zhan et al.
	Article Information				Trial Specifications					Approach	Performance Measures Evaluated
Citation No.	Author	Journal	Title	Year	Randomization	Number of clusters	Cluster size & variability	ICC	Analytic Model	(S)imulation, (A)nalytic	Bias (Y/N)	Coverage (Y/N)	Type I error (Y/N)	Power/Sample size (Y/N)	Relative Efficiency (RE) / Design Effects (DE)
90	Roberts and Roberts	Clinical trials	Design and analysis of clinical trials with clustering effects due to treatment	2005	Simple, equal # of clusters per arm	14	Mean=20; CV= 0.4	~0.1	Mixed effects model	S	N	N	N	Y	N
92	Candel and Breukelen	Statistics in Medicine	Varying cluster sizes in trials with clusters in one treatment arm: sample size adjustments when testing treatment effects with linear mixed models	2009	Simple, equal and unequal # of clusters per arm	12	Mean=6, 10 CV=0.24 to 0.55, cluste sizes follow Unimodal, uniform, bimodal, positively skewed, negatively skewed distribution	0.01 to 0.3	Mixed effects model	S&A	N	N	N	N	Y (RE)
93	Candel and Breukelen	Computational Statistics and Data Analysis	D-optimality of unequal versus equal cluster sizes for mixed effects linear regression analysis of randomized trials with clusters in one treatment arm	2010	Simple, equal # of clusters per arm	12	Mean=4, 12 CV=0.24 to 0.55 Unimodal, uniform, bimodal, positively skewed, negatively skewed distribution	0.01 to 0.3	Mixed effects model	S&A	N	N	N	N	Y (RE)
91	Hedges and Citkowicz	Behavior Reseach Methods	Estimating effect size when there is clustering in one treatment group	2015	Simple, equal # of clusters per arm	4 or 7	Not specified	0 to 0.4	Mixed effects model	A	N	N	N	Y	N
